# Supplementary material for: The Copper Chaperone Protein Gene GmATX1 Promotes Seed Vigor and Seedling Tolerance under Heavy Metal and High Temperature and Humidity Stresses in Transgenic Arabidopsis
Source: MDPI journal article supplement (doi:10.3390/plants11101325), 2022-05-17
Supplement: s1 [file s1]

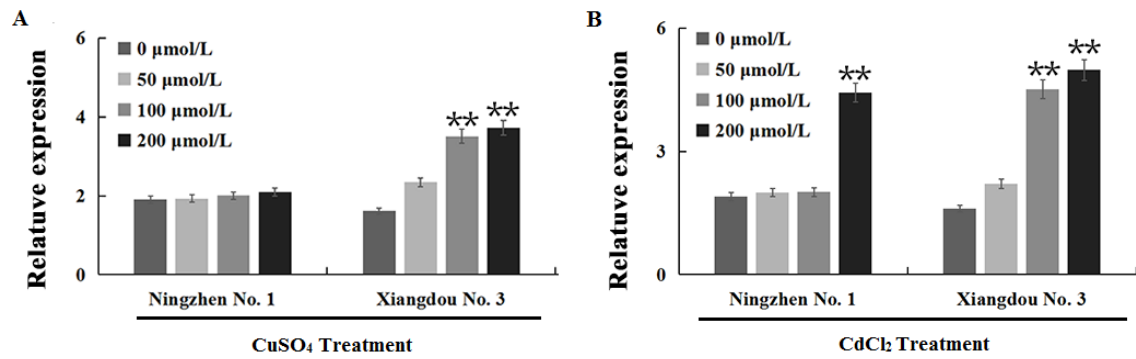

**Supplementary Figure S1:** Expression pattern of *GmATX1* in soybean cultivars Ningzhen No. 1 and Xiangdou No. 3 under heavy metal stress. **A**, the relative expression of *GmATX1* under different concentration of  $\text{CuSO}_4$  stress (for 24h) in roots of 2-week-old soybean seedlings. **B**, the relative expression of *GmATX1* under different concentration of  $\text{CdCl}_2$  stress (for 24h) in roots of 2-week-old soybean seedlings. \*\* indicates significant differences between the control and treatments at  $p < 0.01$ . Values are mean  $\pm$  SD from three biological replicates.

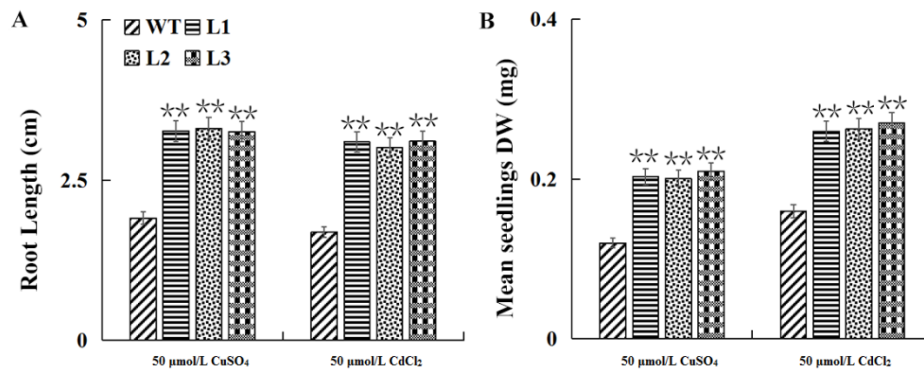

**Supplementary Figure S2:** Effect of heavy metal stresses on seedlings of *GmATX1*-overexpressed *Arabidopsis*. **A**, effect on root length of the transgenic *Arabidopsis* seedlings after sown on MS medium containing 50  $\mu\text{mol/L}$   $\text{CuSO}_4$  and 50  $\mu\text{mol/L}$   $\text{CdCl}_2$  for 10 d, respectively. **B**, effect on dry weight (DW) of the transgenic *Arabidopsis* seedlings after sown on MS medium containing 50  $\mu\text{mol/L}$   $\text{CuSO}_4$  and 50  $\mu\text{mol/L}$   $\text{CdCl}_2$  for 10 d, respectively. Values shown are mean  $\pm$  SD from three biological replicates. \*\* indicates significant differences between the WT and transgenic *Arabidopsis* lines at  $p < 0.01$ .

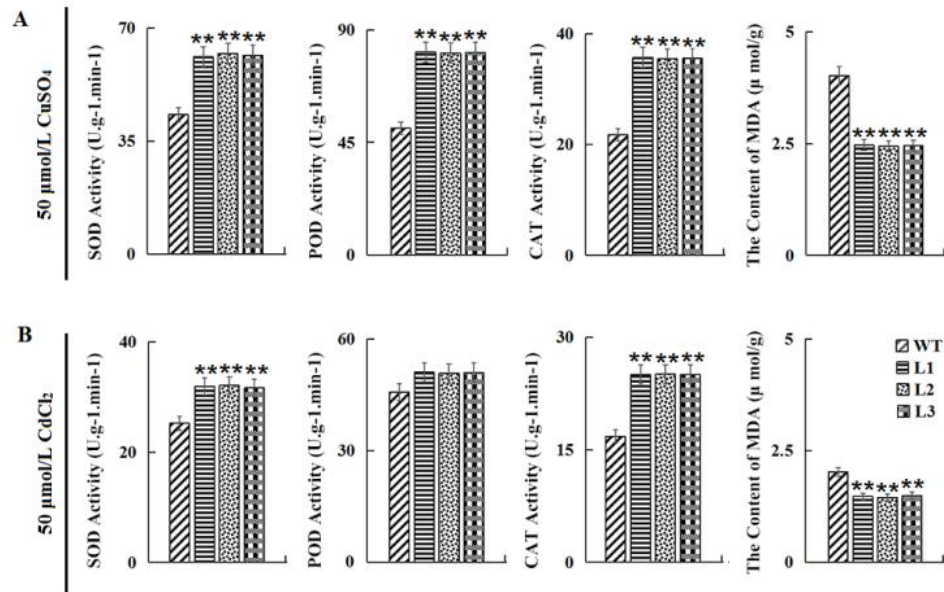

**Supplementary Figure S3:** Effects of copper and cadmium stresses on antioxidase activity and ROS scavenging of WT and *GmATX1*-overexpressed *Arabidopsis* seedlings. **A**, activities of SOD, CAT and POD and contents of MDA in the leaves of the seedlings of the transgenic *Arabidopsis* lines (L1, L2 and L3) and WT after sown on MS medium containing 50  $\mu\text{mol/L}$   $\text{CuSO}_4$  for 10 d; **B**, activities of SOD, CAT and POD and contents of MDA in the leaves of the seedlings of the transgenic *Arabidopsis* lines (L1, L2 and L3) and WT after sown on MS medium containing 50  $\mu\text{mol/L}$   $\text{CdCl}_2$  for 10 d. Values shown are mean  $\pm$  SD from three biological replicates. \*\* indicates significant differences between the WT and transgenic *Arabidopsis* lines at  $p < 0.01$ .

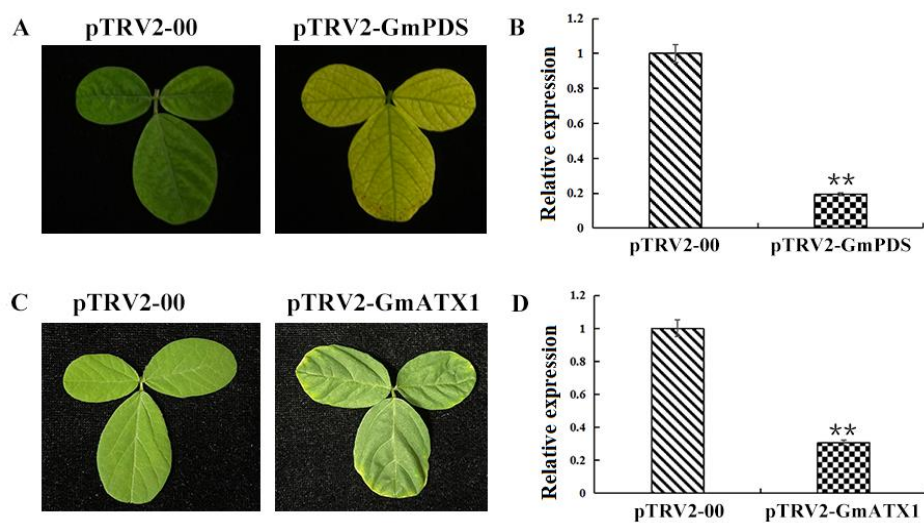

**Supplementary Figure S4:** Identification of *GmPDS*-silent and *GmATX1*-silent soybean plants. **A**, phenotypes of soybean cultivar Xiangdou No. 3 at 25 d after injected with recombinant viruses carrying

*GmPDS*. **B**, expressions of *GmPDS* in leaves of *GmPDS*-silent soybean. **C**, phenotypes of soybean cultivar Xiangdou No. 3 at 25 d after injected with recombinant viruses carrying *GmATX1*. **D**, expressions of *GmATX1* in leaves of *GmATX1*-silent soybean. Values shown are mean  $\pm$  SD from three biological replicates. \*\* indicates significant differences between the control and gene silent soybean line at  $p < 0.01$ .
