# Supplementary material for: The Copper Chaperone Protein Gene GmATX1 Promotes Seed Vigor and Seedling Tolerance under Heavy Metal and High Temperature and Humidity Stresses in Transgenic Arabidopsis
Source: MDPI journal article supplement (doi:10.3390/plants11101325), 2022-05-17
Supplement: s1 [file s1]

**Supplemental Table S1. Sequences of primers used in this study**

| <b>Name</b>      | <b>Sequence (5'-3')</b>                   | <b>Function</b>                                           |
|------------------|-------------------------------------------|-----------------------------------------------------------|
| GmATX1-F         | TAAAGACACCACCTTACACAC                     | Gene isolation                                            |
| GmATX1-R         | GAAACAGACCTACTTCCACATAGA                  | Gene isolation                                            |
| pA7-GmATX1-F     | CATTTACGAACGATACTCGAGATGTCTTCTCAGACCGTTG  | Subcellular localization assay                            |
| pA7-GmATX1-R     | CTCGAGTATCGTTTCGTAAATGAGCAACAGTTTCAACAGCA | Subcellular localization assay                            |
| pBI121-ATX1-F    | GAGAACACGGGGGACTCTAGAATGTCTTCTCAGACCGTTG  | Transgenic                                                |
| pBI121-ATX1-R    | TCTAGAGTCCCCCGTGTCTCAGCAACAGTTTCAACAGCA   | Transgenic                                                |
| pBI121-GUS-35s-F | TGAAGATGCCTCTGCCGA                        | Transgenic                                                |
| pBI121-GUS-GUS-R | CTGATCGTTAAAACTGCCTGG                     | Transgenic                                                |
| TRV2-ATX1-F      | GTGAGTAAGGTTACCGAATTCCGGAAAGAAGACGGCATTC  | Primers used for VIGS vector construction                 |
| TRV2-ATX1-R      | CGTGAGCTCGGTACCGGATCCTTTCAACAGCAGTTTCTGA  | Primers used for VIGS vector construction                 |
| TRV2-GmPDS-F     | GTGAGTAAGGTTACCGAATTCTCCACCTTTCGTGCTTCTC  | Primers used for VIGS vector construction                 |
| TRV2-GmPDS-R     | CGTGAGCTCGGTACCGGATCCTCAGGTACGCCCTGCTTTT  | Primers used for VIGS vector construction                 |
| qRT-GmPDS-F      | CGTTTCATTGGACGGGGCTT                      | Detection of <i>PDS</i> relative expression               |
| qRT-GmPDS-R      | CAAACGACACGCAAGGGAGA                      | Detection of <i>PDS</i> relative expression               |
| qRT-GmATX1-F     | TTCTCAGACCGTTGTCCTCA                      | Detection of <i>ATX1</i> relative expression              |
| qRT-GmATX1-R     | CACATAGAAAAATAGAAC                        | Detection of <i>ATX1</i> relative expression              |
| qRT-GmATX1-F     | TTCTCAGACCGTTGTCCTCA                      | Quantitative real-time PCR expression analysis in soybean |
| qRT-GmATX1-R     | TTCAGTGCACCTTCTGCTCCT                     | Quantitative real-time PCR expression analysis in soybean |
| Actin-F          | CCTCAACCCAAAGGTCAACAG                     | Quantitative real-time PCR expression analysis            |
| Actin-R          | GACCAGCGAGATCCAAACGAA                     | Quantitative real-time PCR expression analysis            |
| Tubulin-F        | CTCAAGAGGTTCTCAGCAGTA                     | For genetically functional verification                   |
| Tubulin-R        | TCACCTTCTTCATCCGCAGTT                     | For genetically functional verification                   |
